# Supplementary material for: Metabolic Noise and Distinct Subpopulations Observed by Single Cell LAESI Mass Spectrometry of Plant Cells in situ
Source: PubMed Central journal article supplement (PMC6250120; doi:10.3389/fpls.2018.01646), 2018-11-15
Supplement: Image_1.pdf [file Image_1.pdf]

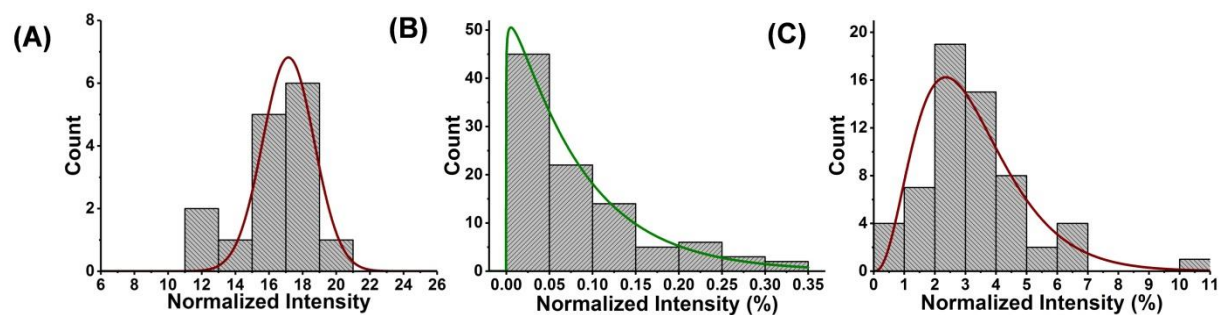

**Figure S1.** (A) Technical variability for f-LAESI-MS based on sampling 1  $\mu\text{L}$  droplets ( $n = 15$ ) of 500  $\mu\text{M}$  glutamate standard solution. Results are consistent with a normal distribution and a COV of 14.9%. Single cell results are a convolution of technical and biological variability. For example, sampling (B) *E. densa* epidermal cells ( $n = 97$ ) and (C) *G. max* infected root nodule cells ( $n = 60$ ) revealed gamma distributions with COV values of 97.3% and 50.7%, respectively.
